# Supplementary material for: A polymer-based chemical tongue for the non-invasive monitoring of osteogenic stem-cell differentiation by pattern recognition of serum-supplemented spent media
Source: Royal Society of Chemistry journal article supplement (doi:10.1039/d2tb00606e), 2022-01-01
Supplement: d2tb00606e1.xlsx [file d2tb00606e1.xlsx]

## Sheet: Dataset S1
	Dataset S1. Data set matrix of the differences in fluorescence intensity before and after the addition of proteins (I–I0, 20.0 μg/mL) generated from the chemical tongue. The jackknife test afforded 100% accuracy.
		P1		P2		P3		P4		P5
		Ch1	Ch2	Ch1	Ch2	Ch1	Ch2	Ch1	Ch2	Ch1	Ch2
	Lacg	56.2586	123.67	80.7791	128.859	65.3134	103.641	37.8125	74.7752	30.5902	49.2492
	Lacg	60.8295	129.173	81.506	129.107	65.9961	104.118	37.0564	75.1552	29.6813	50.8151
	Lacg	61.4145	128.369	78.7889	125.724	64.4385	103.009	38.0624	71.2874	33.9607	56.97
	Lacg	55.656	116.183	77.9797	123.916	65.2871	104.612	34.2518	63.064	30.1523	49.4324
	Lacg	58.2615	122.832	77.6157	122.928	66.0005	104.534	34.8824	64.0611	32.0323	53.5764
	Lacg	59.5395	126.02	77.2276	123.657	61.45	97.2822	35.7041	66.7876	32.1434	51.6369
	GOX	48.6486	123.684	53.8137	116.89	43.4101	98.4524	35.2274	79.4821	31.1491	60.381
	GOX	49.8918	121.88	51.7443	116.497	44.19	96.0817	32.1994	77.4865	29.1114	57.9774
	GOX	49.2381	121.91	55.2566	115.808	43.1603	99.3421	36.0931	88.7114	31.503	61.4336
	GOX	44.4229	112.826	49.1986	108.016	45.5799	102.403	34.1386	81.4631	28.6146	56.6513
	GOX	48.6851	119.377	50.4805	110.576	46.2349	102.316	33.9827	81.4889	28.9155	55.894
	GOX	48.7204	120.134	52.0431	108.976	45.4753	100.878	35.1766	84.467	31.2586	56.487
	Gal	1.64975	14.9301	0.574125	15.5185	1.60225	23.4825	0.963875	11.916	3.07263	8.97675
	Gal	2.04512	13.1695	2.19338	15.3595	3.5295	25.9876	1.5925	12.4088	3.30238	9.39375
	Gal	2.80938	14.5116	0.571	16.1134	4.67488	26.053	1.92263	12.1313	3.3565	10.5817
	Gal	2.12488	14.646	1.18213	17.1987	4.62525	26.0658	2.36525	12.1904	3.54475	8.58575
	Gal	1.46525	14.6879	1.40337	14.677	3.18413	23.6369	2.67975	13.2534	3.29025	8.68113
	Gal	2.60588	15.2915	1.14563	13.9988	3.21975	24.0874	2.08962	12.8424	3.57375	8.5695
	BSA	38.2911	80.3554	49.939	86.8435	44.2037	72.0904	31.531	54.4145	15.7934	27.4394
	BSA	38.9451	79.0786	49.9808	85.2071	44.5352	77.8874	31.2871	53.8614	16.3151	26.3699
	BSA	38.9132	80.9331	51.1261	86.807	44.5184	77.6368	31.6151	55.8272	16.4046	28.2526
	BSA	37.9435	75.5056	47.7807	83.3026	41.0444	70.7269	30.1494	52.9367	15.6363	26.9305
	BSA	37.9214	74.4099	48.9296	84.388	45.0473	77.8702	31.9011	54.6708	15.2344	26.0256
	BSA	38.5109	80.6775	49.3748	82.4873	42.047	72.7877	31.5895	54.3803	14.9829	26.1842
	Fib	22.2566	31.2938	26.7576	36.6191	27.1211	42.7715	20.5989	28.2706	11.2241	11.5557
	Fib	23.2963	30.0125	28.3536	37.2722	25.9959	41.3469	22.4924	27.5523	12.5817	12.1829
	Fib	23.104	32.4859	28.5684	39.3074	26.9453	43.234	22.4561	27.5988	11.9286	13.0536
	Fib	22.614	30.976	26.2641	37.9706	25.4995	39.2692	22.6668	28.9221	12.6729	11.8137
	Fib	22.8151	31.494	27.945	38.7484	28.3195	42.4009	23.2371	27.722	11.057	9.8855
	Fib	21.9497	30.6824	27.0755	36.2731	25.7864	40.334	21.3063	26.9484	11.6386	10.5955
	HSA	33.8588	67.2025	45.0746	70.7014	41.5053	68.948	28.9417	47.0774	13.1669	23.6189
	HSA	33.2242	61.723	46.2647	71.1571	42.797	71.4232	29.6669	46.8617	13.1881	24.1244
	HSA	33.2221	62.9226	43.6403	67.5187	44.3305	76.1216	29.9335	47.0875	13.2646	24.8691
	HSA	31.1231	57.755	45.0932	70.1014	40.3627	68.8396	26.9926	42.8528	12.8705	24.5398
	HSA	31.0138	60.0255	45.6898	69.6195	43.9924	73.724	28.9366	44.573	13.387	25.1411
	HSA	31.8193	61.0185	43.2526	63.9386	41.1476	70.3594	27.9834	43.3077	13.0329	23.2786
	Cat	35.1955	82.2962	33.022	76.3744	23.4229	59.5616	23.1748	53.111	13.9859	26.8719
	Cat	33.1097	75.8372	35.0896	78.2366	24.6554	61.0611	24.3785	55.3898	16.0645	29.7454
	Cat	34.7831	80.183	32.8081	74.5596	26.3905	65.6888	24.5901	53.4668	15.3167	29.7288
	Cat	31.9246	76.6444	34.0365	76.0768	22.8404	60.6052	20.2987	46.8925	14.9995	29.2751
	Cat	34.2854	79.9543	35.3951	80.6059	27.052	65.4821	23.9989	52.7807	15.391	28.2752
	Cat	32.4294	76.6345	32.0664	72.2144	24.697	63.2464	21.7114	50.3222	14.9026	26.7266
	Hem	-12.7574	1.27988	-18.044	3.98912	-23.7413	2.37825	-14.3711	2.401	-8.86388	5.37637
	Hem	-11.6391	2.44088	-17.2014	3.46537	-22.7394	4.36912	-13.1957	3.069	-7.89138	5.51525
	Hem	-10.6236	1.88425	-15.6761	5.96862	-22.6332	4.85863	-12.9275	4.37425	-8.91787	5.41612
	Hem	-12.3715	0.773875	-17.9045	4.64763	-22.9339	2.23538	-12.4996	2.94475	-8.23813	4.05725
	Hem	-12.0187	0.368	-16.565	5.43525	-23.6536	3.12825	-12.7387	3.31462	-9.089	4.25663
	Hem	-11.5079	1.68663	-16.1867	4.30188	-23.8642	1.81775	-12.7386	3.35587	-8.42562	3.3795

## Sheet: Dataset S2
	Dataset S2. Data set matrix of the differences in fluorescence intensity before and after the addition of serum-supplemented spent media used to culture human cell lines (I–I0) generated from the chemical tongue. The jackknife test afforded 98% accuracy. The rightmost column indicates whether the data in the corresponding row was used as training data (denoted by “–”) or test data (results of the…
		P1		P2		P3		P4		P5		Verification by Holdout test
		Ch1	Ch2	Ch1	Ch2	Ch1	Ch2	Ch1	Ch2	Ch1	Ch2
	control	41.8027	79.8828	55.6843	87.0971	42.7646	66.1462	32.7369	53.4394	15.2408	22.4579	-
	control	40.1953	76.0279	53.8626	84.9943	43.7263	72.4359	33.7993	53.3565	15.3652	25.2639	-
	control	40.4055	76.4525	54.4027	88.3149	42.1624	68.8708	32.1236	53.8355	14.0152	22.0655	-
	control	38.4733	74.3072	54.6335	88.7491	46.4371	76.3286	33.7089	54.65	14.0171	24.7997	-
	control	39.1939	76.3568	51.9988	84.8916	44.5836	71.1926	33.1688	55.1505	14.0729	20.6112	-
	control	37.6171	73.0269	53.8017	87.1508	44.5105	72.9724	32.4574	52.485	14.3586	24.4928	-
	HepG2	51.1099	98.2678	58.4039	97.7382	48.5485	84.6107	36.6884	66.1551	18.2814	33.3086	-
	HepG2	51.1001	99.0634	59.9487	99.8354	51.1744	88.022	36.2016	64.9926	19.4484	35.3321	-
	HepG2	51.8055	99.1789	62.4459	104.952	52.0288	91.2391	39.7137	70.5767	17.7965	34.2108	-
	HepG2	49.7411	96.2939	59.4561	97.3374	51.4634	90.2479	35.6386	63.6459	17.9805	33.0375	-
	HepG2	51.1646	100.026	60.1544	103.953	52.1599	92.3584	38.5947	71.4532	19.0448	33.1199	-
	HepG2	51.8821	98.2857	58.2154	97.9241	45.8496	79.7726	35.7989	62.0139	19.0314	32.084	-
	A549	44.4665	97.514	54.938	100.319	45.1524	86.4317	33.3368	68.8037	17.0431	40.5768	-
	A549	48.3145	104.455	56.8787	107.862	49.008	94.6595	35.3876	72.7483	17.4609	41.3937	-
	A549	44.4355	100.335	54.2093	102.085	45.7983	89.569	35.4644	71.2635	16.8537	42.2972	-
	A549	47.4478	104.101	59.94	112.466	50.211	96.9949	35.2728	73.9381	16.8315	42.2476	-
	A549	46.2985	100.264	52.8556	98.729	43.9254	87.8016	35.1305	71.9333	17.5084	41.6936	-
	A549	47.5468	102.2	59.9754	113.382	51.7321	97.4861	35.912	72.0736	16.1322	41.9226	-
	MG63	40.784	85.9048	48.0703	86.2021	34.4801	70.0654	29.3227	59.486	17.1414	33.9076	-
	MG63	43.7506	90.8423	50.0036	90.4389	43.2805	81.8584	30.5059	58.9688	17.0292	31.908	-
	MG63	42.4505	85.8184	49.1151	87.7454	36.4424	73.0785	30.7746	59.007	16.3471	32.9781	-
	MG63	41.3941	84.4125	47.8226	86.1601	34.7566	70.0724	29.718	58.7415	17.0922	35.0633	-
	MG63	44.2936	90.1272	51.3205	95.8259	42.5785	80.2442	32.154	60.2419	16.7585	33.5326	-
	MG63	40.6894	83.3026	48.758	85.0212	37.5265	71.0291	31.9468	60.0727	17.5225	31.8166	-
	UE7T	37.6683	79.4604	48.3505	83.7972	36.6596	70.8004	29.5802	56.8685	15.9815	30.8236	-
	UE7T	41.537	88.215	52.5195	91.6265	48.4521	82.2473	30.4322	57.3832	15.2645	30.8765	-
	UE7T	38.5892	83.2413	47.7379	85.6733	38.9804	74.6145	29.9307	58.8245	16.3089	31.3516	-
	UE7T	42.2689	86.9382	53.9378	97.3455	45.6401	82.5195	30.3841	58.2447	15.1978	32.3989	-
	UE7T	37.7366	79.4392	46.8937	82.4354	38.4099	73.4184	29.703	56.7118	15.4964	29.9851	-
	UE7T	41.4803	89.1205	54.5165	97.3451	47.6145	83.1361	31.8688	59.4877	16.5277	30.3479	-
	HeLa	30.4123	64.732	40.8358	70.3196	33.1501	64.4938	26.2384	48.8828	13.6986	29.3534	-
	HeLa	34.5062	72.5747	38.2701	68.3664	33.2939	63.9904	26.9889	52.1538	13.4301	31.0211	-
	HeLa	39.7075	77.5664	39.7139	71.2144	39.0928	72.2499	30.7425	58.5643	15.0671	32.0546	-
	HeLa	35.6729	69.7825	43.2538	74.4303	39.4874	71.8763	29.2969	56.2426	15.2331	32.7934	-
	HeLa	38.8193	76.1058	42.813	69.6039	38.1914	67.9949	30.0824	56.1151	15.2076	27.8212	-
	HeLa	37.7705	73.3508	44.2097	76.4234	38.4843	70.8517	30.6258	58.0718	16.5442	31.0575	-
	MCF7	28.3302	56.7676	38.1659	61.7055	33.2871	58.2254	25.8246	43.8664	11.2818	22.2969	-
	MCF7	33.0796	61.8738	42.3109	65.8563	40.276	65.9721	30.6149	50.6318	13.7446	25.5513	-
	MCF7	30.6682	58.9079	42.8191	68.076	36.868	62.3431	27.0491	47.5041	14.1086	26.2691	-
	MCF7	34.3815	63.9915	42.2911	64.6593	39.006	64.0062	30.977	49.6673	14.087	23.6778	-
	MCF7	31.1496	60.0927	41.675	65.231	36.3968	61.2986	25.1669	44.56	13.1435	23.0498	-
	MCF7	33.6486	62.3709	44.4938	67.9338	38.9326	63.129	30.5135	49.7425	14.3319	23.1524	-
	control	41.0243	78.6868	54.7779	84.0889	44.3562	66.2429	33.0668	52.4616	13.4664	16.858	control
	control	38.2541	71.8492	55.08	81.79	46.5719	72.6183	33.8147	51.1819	14.9803	22.7228	control
	control	39.9069	75.1614	52.4689	81.4926	43.0885	66.3785	32.3536	52.3731	12.7589	17.4054	control
	control	39.1557	75.0555	53.3075	87.2629	44.5035	70.8336	32.4249	50.0212	13.3989	21.3636	control
	HepG2	53.0049	98.438	64.0403	105.94	52.1219	89.0143	41.0754	68.0803	19.8755	31.2401	HepG2
	HepG2	50.2945	95.1035	58.3737	95.638	46.8176	81.1079	37.2166	65.0196	18.3427	31.9514	HepG2
	HepG2	54.0525	100.418	62.4139	104.053	52.2119	86.7458	39.6545	68.9857	18.8161	31.5646	HepG2
	HepG2	51.2968	96.345	58.0688	93.8932	52.1596	88.0568	36.78	65.089	19.4857	31.3912	HepG2
	A549	45.9646	98.8011	54.1462	98.6725	44.5845	85.1502	35.5698	70.5452	16.4389	38.3814	A549
	A549	48.2131	104.044	60.2951	110.771	49.3305	92.0709	37.106	73.1985	16.5625	39.6635	A549
	A549	49.6268	103.559	54.1005	98.0991	45.5424	85.7136	35.2426	71.4735	17.0186	40.5767	A549
	A549	48.8226	105.293	59.9628	112.911	47.9339	90.6416	37.1707	72.5021	16.536	38.5797	A549
	MG63	45.8541	91.2511	53.2419	95.8892	43.9454	80.503	31.155	59.361	16.7583	29.9034	MG63
	MG63	42.651	83.3462	46.9906	81.756	34.8294	68.8776	31.2644	59.617	16.9604	31.65	MG63
	MG63	47.8781	95.2262	55.6549	100.336	42.0281	76.6655	32.177	59.6826	16.9691	31.4365	MG63
	MG63	41.1317	84.4112	49.3631	83.9879	35.9299	68.9827	31.1142	61.0309	17.0656	32.309	MG63
	UE7T	39.6819	82.5929	47.6616	80.7807	38.6701	74.5252	30.5768	57.451	17.299	30.993	MG63
	UE7T	40.1425	80.8269	46.907	78.3528	38.7055	69.6073	30.4718	55.3014	16.6079	29.6474	UE7T
	UE7T	42.7667	86.2071	55.6895	98.025	44.9506	77.1025	31.1496	57.0651	15.6123	28.737	UE7T
	UE7T	38.9236	80.6305	46.8834	81.0051	40.2645	72.311	29.4806	55.2617	15.9776	29.5021	UE7T
	HeLa	38.4736	75.6381	46.0697	77.498	38.6489	70.6407	30.5186	57.4884	15.4331	30.4962	HeLa
	HeLa	40.1759	78.7595	42.8851	76.2356	37.9129	71.1285	31.8596	60.6088	14.6606	30.4496	HeLa
	HeLa	39.5065	76.5331	40.8599	71.1335	39.7828	72.5681	29.407	54.665	14.5079	28.3711	HeLa
	HeLa	37.236	72.6374	43.5581	75.7428	39.4556	70.6776	31.848	58.1839	15.0495	28.8611	HeLa
	MCF7	34.4426	67.0779	42.2675	65.7606	35.4786	60.5341	27.5319	48.3124	13.3011	25.7314	MCF7
	MCF7	35.8515	67.4772	40.9552	65.3764	38.8625	65.025	30.328	49.978	14.1946	25.586	MCF7
	MCF7	33.8579	64.2	41.522	65.346	36.9248	63.0565	29.572	51.097	13.6167	24.2575	MCF7
	MCF7	28.7496	56.4822	38.344	64.7304	34.294	62.4899	27.9604	49.858	12.3009	24.5308	MCF7

## Sheet: Dataset S3
	Dataset S3. Data set matrix of the differences in fluorescence intensity before and after the addition of serum-supplemented spent media collected during differentiation induction (I–I0) generated from the chemical tongue in 19 mM MOPS buffer (pH = 7.4). The jackknife test afforded 83% accuracy. The rightmost column indicates whether the data in the corresponding row was used as training data (de…
		P1		P2		P3		P4		P5		Verification by Holdout test
		Ch1	Ch2	Ch1	Ch2	Ch1	Ch2	Ch1	Ch2	Ch1	Ch2
	Blank	38.0791	72.449	54.4759	84.9279	51.9061	78.7978	33.5639	53.7648	15.2955	22.4103	-
	Blank	33.3456	69.8281	46.348	77.9475	48.3839	76.7641	31.1481	51.5965	14.6571	21.237	-
	Blank	41.0995	76.8966	53.5732	83.4841	50.7051	77.1396	32.7914	52.8375	15.0462	21.7054	-
	Blank	36.4763	71.3869	52.4344	82.9578	50.0334	77.012	32.2749	52.6686	15.5685	21.0421	-
	Blank	37.1089	72.8501	52.5406	83.727	49.7561	76.2375	32.3962	51.8104	15.5395	21.2464	-
	Blank	38.8531	74.4784	53.7985	84.9645	52.5921	79.3455	34.0716	53.7895	16.5614	22.286	-
	d1	35.8109	77.562	48.5527	84.2296	47.2499	77.5658	30.7287	53.9035	14.8454	26.4447	-
	d1	31.9231	74.8076	42.172	79.4768	42.4259	74.1489	24.5935	50.23	13.0587	24.7951	-
	d1	37.2178	79.3115	49.8044	87.14	41.8049	74.4591	27.5634	53.449	15.3737	26.7737	-
	d1	31.6384	70.609	46.1434	81.0943	44.2881	78.1953	27	52.6055	14.0741	25.5573	-
	d1	34.8852	75.337	47.214	81.458	44.1221	74.295	27.4256	51.8756	12.975	25.3199	-
	d1	35.6565	76.5949	50.836	87.0205	48.0446	78.2598	30.7731	54.948	14.7064	25.9773	-
	d4/-	38.6926	82.539	47.9365	85.9226	43.3236	76.8774	26.7581	54.0805	14.7245	27.7401	-
	d4/-	30.2793	71.3606	42.6803	82.4808	38.7976	74.6472	24.6322	53.5409	13.6696	26.5701	-
	d4/-	39.5116	82.4407	50.4793	89.04	43.1951	77.4026	29.2209	56.8305	15.1389	28.644	-
	d4/-	39.3595	83.3634	46.346	84.6235	41.7047	76.1715	26.83	53.8175	14.8546	27.3532	-
	d4/-	32.8311	72.1462	46.8271	84.0739	41.215	75.8651	26.9094	53.484	13.9817	28.3136	-
	d4/-	38.3978	86.8833	50.2922	88.4745	45.7879	79.0372	28.3224	55.2269	15.7364	27.3092	-
	d4/+	42.177	85.2209	49.7308	88.1955	46.9378	79.3234	29.3438	56.7439	16.0338	28.411	-
	d4/+	32.2707	74.1206	46.6916	86.2556	42.1884	75.9075	27.3887	54.7657	14.6813	27.9009	-
	d4/+	44.408	87.5346	50.2491	87.5166	44.3169	77.0114	28.5565	55.5609	16.3971	27.9728	-
	d4/+	48.0376	195.515	50.835	88.6893	45.912	79.1008	29.9061	56.0031	16.6859	26.368	-
	d4/+	38.9747	80.9424	50.3389	88.3066	44.2324	76.7189	28.2172	54.3466	16.1144	28.1469	-
	d4/+	43.6198	86.0352	47.8499	84.4904	47.2669	79.8394	29.1343	52.8731	15.7621	26.8656	-
	d8/-	56.2888	99.1678	51.8411	88.2374	41.9794	75.3845	31.0846	58.6269	17.8498	30.0595	-
	d8/-	55.252	98.3533	50.7249	88.9524	39.8837	74.4389	31.2225	57.9331	17.1301	29.6219	-
	d8/-	50.7615	94.4261	50.1865	86.5156	43.6836	77.3524	29.5586	55.1691	17.0936	29.3309	-
	d8/-	52.5177	94.616	51.3317	88.5021	41.4062	75.4513	32.0652	58.3922	17.8289	29.0556	-
	d8/-	45.2043	86.7931	49.5138	85.6595	40.0157	72.6074	31.0579	57.5354	16.8151	28.1536	-
	d8/-	56.6442	100.163	52.5415	90.0299	45.2989	77.8736	32.9381	59.8354	18.778	30.2628	-
	d8/+	64.2849	99.9576	63.6266	93.4856	55.6781	82.5549	34.2355	55.8114	17.5892	25.9458	-
	d8/+	64.6516	99.936	61.5122	92.872	53.2416	81.159	32.5464	54.4011	16.6014	25.8014	-
	d8/+	59.2261	95.0905	62.7746	92.7002	50.1252	76.0035	32.4303	53.5726	17.939	26.4289	-
	d8/+	62.1289	98.3556	60.9211	89.3184	49.3238	75.0645	31.7869	51.0442	16.4743	25.6399	-
	d8/+	59.0318	96.2194	62.5041	91.6268	49.7801	75.4843	30.8514	50.9248	15.915	25.2994	-
	d8/+	65.9098	103.485	67.632	97.6856	57.9649	84.1813	35.7146	57.3168	20.5269	27.533	-
	d12/-	45.9979	94.0911	49.0472	88.7998	41.633	80.4531	26.0225	57.9541	16.3446	31.6095	-
	d12/-	52.771	98.1807	50.969	89.5427	43.4779	80.6506	30.3775	58.2572	15.8001	31.8034	-
	d12/-	57.4369	98.6213	48.3664	86.9698	38.8657	73.2392	26.6584	53.6515	16.1701	32.385	-
	d12/-	61.5059	105.004	49.731	87.9649	44.9875	79.8325	29.2733	56.7889	16.4577	32.4564	-
	d12/-	58.0908	101.235	49.0628	87.1394	43.4637	79.0882	28.5808	55.8496	15.9916	31.6342	-
	d12/-	62.5712	105.709	54.0503	91.47	46.8619	82.2031	31.8547	59.8256	17.9552	32.5174	-
	d12/+	60.6875	94.7284	69.687	97.6136	57.7856	83.463	33.0805	52.944	20.1555	27.2259	-
	d12/+	59.431	95.1648	67.0853	96.9178	59.8016	87.9699	32.0759	51.4718	18.5774	26.5561	-
	d12/+	59.2961	93.7954	63.4318	92.9264	50.1873	81.1771	31.8734	51.5257	17.7285	26.5098	-
	d12/+	56.4251	91.1792	65.7346	94.5245	55.8655	82.5129	31.6305	52.301	19.1737	26.6166	-
	d12/+	57.6148	91.8086	66.484	96.6894	63.5547	90.0632	31.7916	50.7239	18.7276	26.4408	-
	d12/+	63.6494	97.7885	70.9367	99.0541	59.5192	85.8844	34.0544	53.3929	19.5094	26.9664	-
	Blank	38.0348	72.5865	54.8525	86.5926	53.4779	79.8984	34.3651	53.4194	15.6586	21.775	Blank
	Blank	38.3306	72.8141	53.5854	83.7816	53.2027	78.9931	34.6947	53.5145	15.6723	22.1367	Blank
	Blank	38.7875	74.0921	54.8612	84.082	52.8407	78.7451	34.0671	53.0577	16.885	22.3362	Blank
	Blank	36.9689	71.2133	55.4015	83.8104	50.9391	76.9486	34.3984	54.0237	16.8799	21.785	Blank
	d1	32.9553	72.5409	46.787	81.7498	48.94	79.4881	28.853	53.5521	13.7775	25.781	d1
	d1	36.4876	77.6229	47.837	82.0765	43.9836	75.8148	28.0272	53.096	13.6411	25.9682	d1
	d1	33.98	73.7226	49.0082	82.7006	45.9967	76.1098	29.56	52.3246	14.3562	26.4476	d1
	d1	35.6167	74.2065	48.9489	82.6365	46.8064	75.8201	29.9716	52.5839	15.5134	25.9458	d1
	d4/-	35.3875	76.4916	48.3178	85.8106	46.7676	80.2205	29.4757	54.8008	14.8958	27.8986	d4/-
	d4/-	39.7571	83.6659	49.2605	85.8786	45.1917	78.0729	27.3583	53.9275	14.8115	27.9051	d4/-
	d4/-	35.9228	76.744	49.2121	85.9891	47.1688	78.8251	28.9869	54.1172	15.7076	27.1945	d1
	d4/-	38.9708	81.9549	49.9402	87.2635	47.6202	78.9179	28.5546	54.4749	16.5206	28.5409	d4/+
	d4/+	38.3746	79.4054	50.9699	87.1636	45.9801	78.2361	31.4691	56.7071	16.2587	27.6698	d1
	d4/+	44.772	88.0068	51.6812	88.8549	45.3039	78.3086	29.3024	55.8876	16.6534	28.3461	d4/+
	d4/+	41.8374	83.4064	52.2655	90.0676	48.6093	80.1275	29.7009	56.0876	17.0971	28.4975	d4/+
	d4/+	44.0525	86.5401	54.2843	91.3192	45.7747	75.2345	33.0565	57.1404	16.6237	26.9618	d1
	d8/-	50.7841	91.2459	50.637	85.5215	44.524	76.5536	31.0095	57.6404	18.7458	29.682	d8/-
	d8/-	54.8504	96.5861	50.5506	86.5413	42.209	76.0147	31.9943	57.8424	17.7176	28.7422	d8/-
	d8/-	44.1913	83.377	50.9776	86.6764	41.231	74.7371	30.5089	57.2728	18.5783	37.8053	d12/-
	d8/-	49.2066	90.3888	51.2426	87.1825	41.3714	74.4204	31.903	57.3381	18.3731	29.3694	d8/-
	d8/+	64.2931	100.253	65.6124	94.4273	58.9211	85.6806	36.154	57.6045	19.1859	26.7006	d8/+
	d8/+	63.1242	96.4909	66.4685	93.5509	57.2792	83.3587	33.4337	53.8058	16.5795	25.333	d8/+
	d8/+	62.7166	98.1894	65.2719	93.0607	56.2948	81.2476	35.1964	55.2016	17.9019	26.4536	d8/+
	d8/+	64.685	100.216	65.6303	94.7304	57.1572	83.7638	35.249	56.0588	19.5038	27.2362	d8/+
	d12/-	58.1305	101.372	51.0167	88.9016	46.9264	82.4194	32.221	59.6285	18.1061	33.1365	d12/-
	d12/-	61.0577	102.794	54.7062	91.3954	47.3305	80.9939	30.329	56.4038	16.8999	32.4779	d12/-
	d12/-	55.3664	98.9095	51.7369	88.3013	46.227	80.6049	31.3844	57.9499	17.5924	32.6872	d12/-
	d12/-	59.9159	102.282	49.3357	87.6056	44.2818	79.4304	31.0434	59.8456	17.5829	32.8997	d12/-
	d12/+	61.5943	94.7601	70.898	97.2645	64.8337	90.3653	37.0862	56.252	21.3099	27.7801	d12/+
	d12/+	61.7622	95.0938	69.118	95.8796	60.2291	84.7024	33.6677	52.131	19.186	26.4666	d12/+
	d12/+	61.4109	95.7417	68.8911	95.7939	57.1767	83.5031	34.8431	53.8835	19.6864	26.8496	d12/+
	d12/+	61.2871	94.3009	69.2919	96.5455	60.2126	85.2481	35.9575	55.7557	19.5838	26.9492	d12/+

## Sheet: Dataset S4
	Dataset S4. Data set matrix of the differences in fluorescence intensity before and after the addition of serum-supplemented spent media collected during differentiation induction (I–I0) generated from the chemical tongue in 19 mM MES buffer (pH = 5.4). The jackknife test afforded 96% accuracy. The rightmost column indicates whether the data in the corresponding row was used as training data (den…
		P1		P2		P3		P4		P5		Verification by Holdout test
		Ch1	Ch2	Ch1	Ch2	Ch1	Ch2	Ch1	Ch2	Ch1	Ch2
	Blank	33.4469	53.4165	41.4552	58.1051	42.381	57.1641	30.4039	44.3585	8.60312	15.9989	-
	Blank	35.1408	55.1309	39.2599	58.0189	39.9971	55.6241	27.9802	42.0385	6.8325	15.4062	-
	Blank	33.8771	53.5761	41.5338	58.6964	39.8371	54.6174	32.0789	45.9593	9.72462	16.5149	-
	Blank	34.2727	54.6915	40.3992	57.3859	42.305	56.9042	31.3577	44.3221	8.2705	16.1369	-
	Blank	32.8227	52.4433	41.4696	58.7989	40.7974	55.5244	31.1193	44.7599	7.76787	15.3715	-
	Blank	35.5199	56.049	43.2856	61.6168	43.3843	58.0061	31.7548	45.383	8.68025	15.9704	-
	d1	40.022	67.7519	41.4308	65.3424	40.8332	61.1404	30.2988	49.5363	10.8308	23.3792	-
	d1	41.6816	69.1751	39.2071	63.68	40.1006	60.5685	27.0736	47.2323	8.87337	21.9904	-
	d1	44.0892	73.1829	43.7902	64.2536	44.267	64.3174	30.7549	49.0256	10.2287	23.1099	-
	d1	41.1075	69.5902	42.212	65.5115	40.3231	61.9779	30.0741	49.1176	11.4496	24.1039	-
	d1	41.3329	69.7315	42.4393	67.4299	40.1441	60.2301	30.1284	49.4578	8.94475	22.1164	-
	d1	42.699	70.4103	42.5651	66.8017	43.5926	63.6153	30.0023	48.9735	11.8622	23.7658	-
	d4/-	47.948	79.3213	44.3805	70.9209	41.9351	64.7279	31.3909	52.5819	12.5201	26.0225	-
	d4/-	49.8717	83.0853	40.7494	67.9153	44.5688	68.3601	29.5085	51.6369	10.2768	25.5603	-
	d4/-	45.8046	76.9936	44.9334	72.434	45.2066	68.1502	31.0938	52.0635	11.9958	26.2643	-
	d4/-	49.1771	80.5072	43.8759	70.0649	43.3321	66.1535	31.4515	52.3836	12.0482	25.6807	-
	d4/-	48.8836	80.9259	44.8989	71.7764	41.5796	64.1009	31.516	52.3214	12.7079	26.4314	-
	d4/-	49.667	81.0601	45.5071	73.0154	43.4482	66.929	31.5434	52.7788	11.5976	25.2015	-
	d4/+	50.6779	83.1412	45.6501	71.3785	45.458	68.1339	30.9281	51.3804	13.4032	26.1047	-
	d4/+	52.7463	84.9081	43.3214	70.8019	43.409	67.1206	30.2395	52.2267	10.7323	24.9857	-
	d4/+	51.1876	83.294	48.7666	74.304	44.9274	67.2215	33.0621	53.36	13.4849	26.327	-
	d4/+	52.2917	84.6394	44.4446	70.0166	42.9278	64.6865	32.8165	54.2445	13.6393	26.2835	-
	d4/+	52.0227	84.8603	46.7835	72.0157	44.6321	66.5093	32.445	52.63	11.0102	23.2819	-
	d4/+	50.7631	82.3589	45.9694	72.1658	45.6205	68.0526	33.1107	54.4616	13.6441	25.6246	-
	d8/-	69.0384	102.24	59.4007	87.2911	52.8614	77.6107	38.9744	61.1156	17.0824	30.2101	-
	d8/-	73.2429	108.19	58.7871	85.8658	56.1294	81.7055	37.1078	58.5958	18.1295	31.8963	-
	d8/-	68.6149	103.055	58.4262	85.8283	54.6357	78.5395	38.1617	60.5326	16.9171	30.238	-
	d8/-	68.395	102.82	61.256	88.0803	55.4074	79.8011	36.92	58.8549	17.0491	29.8182	-
	d8/-	67.2725	102.69	56.1805	83.6096	50.7729	73.727	37.7822	59.3619	16.2196	29.175	-
	d8/-	71.2561	106.087	59.0425	86.8822	56.4898	81.4895	39.2054	60.8874	17.2154	29.7785	-
	d8/+	72.7485	102.513	70.3978	92.8086	66.6614	87.0445	40.0679	57.2724	21.7064	29.0775	-
	d8/+	75.9119	105.961	73.0006	95.3113	63.2571	84.3841	38.1505	55.7102	23.2609	30.9682	-
	d8/+	73.1698	103.497	71.7606	94.7945	66.582	86.9343	38.5745	55.4776	22.4814	29.7925	-
	d8/+	72.6336	101.977	68.9723	90.7627	64.267	85.1034	37.7785	54.6485	21.7948	29.6881	-
	d8/+	70.3726	99.8107	67.4274	89.273	63.6484	83.0755	37.3659	54.9096	20.6351	29.152	-
	d8/+	74.1191	104.086	71.0691	93.9415	64.9671	86.0415	39.2517	57.8822	17.9186	26.6738	-
	d12/-	54.8371	91.4347	51.5898	81.025	46.9436	72.7875	34.018	59.7899	15.0474	31.568	-
	d12/-	74.5078	111.015	59.298	91.4768	60.1569	89.7529	41.2512	64.3752	17.3753	34.0318	-
	d12/-	70.0116	106.774	65.6637	95.6798	59.3629	86.3563	38.8065	62.4051	18.0574	34.5475	-
	d12/-	72.5652	108.26	62.9491	93.4532	60.7265	88.6112	39.1067	63.4045	18.1236	35.2888	-
	d12/-	73.6834	109.203	61.7892	93.0786	55.6198	83.4141	39.1001	62.9219	18.3515	33.9154	-
	d12/-	69.4761	106.448	61.7027	92.4949	60.485	87.1277	38.7167	63.9329	17.4384	33.7314	-
	d12/+	74.8539	103.026	76.6188	98.8804	74.14	93.3939	44.437	60.9482	26.5621	29.5566	-
	d12/+	76.3515	105.894	79.3989	101.218	71.3856	91.7824	42.0795	58.9205	25.2567	29.191	-
	d12/+	74.2038	103.212	76.8958	98.8295	71.2124	91.1914	41.3605	57.0364	25.3257	29.7524	-
	d12/+	72.5577	100.794	75.651	97.1998	72.6605	93.9082	41.832	57.1152	24.3217	29.0465	-
	d12/+	73.9826	104.008	76.1324	98.0814	70.5115	91.0349	41.8065	56.86	25.6419	29.2398	-
	d12/+	74.7675	105.071	76.2685	97.4196	72.0304	92.1655	42.7781	57.9603	25.6614	30.0485	-
	Blank	34.2769	53.8508	41.6035	58.4719	42.9789	57.1695	32.3806	44.8136	9.26138	16.5761	Blank
	Blank	33.0855	51.509	41.4798	57.417	39.5079	54.3802	32.0427	44.6112	6.90613	15.055	Blank
	Blank	33.7668	52.8486	41.5404	57.6449	43.9046	57.7323	32.1804	45.1097	9.26738	16.3867	Blank
	Blank	33.0094	52.0288	42.6224	59.0751	42.71	56.2636	32.0656	44.6257	8.65762	15.5209	Blank
	d1	42.073	68.4724	41.097	63.554	43.327	62.3404	30.2885	48.8179	11.6657	24.0006	d1
	d1	41.4546	69.5774	42.3091	65.754	41.8267	61.3335	30.3194	48.2805	11.659	24.0157	d1
	d1	42.7089	69.9718	43.921	66.5506	40.6892	60.289	30.3098	48.9426	11.1894	23.3914	d1
	d1	40.7995	66.045	41.1021	64.1488	42.0035	60.8204	29.5495	47.4419	11.6579	23.2529	d1
	d4/-	47.487	79.0907	43.9703	70.4019	44.7121	67.0605	30.9674	52.1673	12.6	26.6574	d4/-
	d4/-	45.414	75.1619	45.1301	70.6354	45.0836	66.2014	31.5094	52.3565	11.8266	24.8154	d4/-
	d4/-	48.6666	79.174	44.364	70.1174	44.3345	66.8266	30.7861	51.1469	11.9664	25.0229	d4/+
	d4/-	51.383	83.2167	42.9936	68.7422	41.1804	66.4494	30.4244	50.7909	12.0115	25.5635	d4/+
	d4/+	49.6894	81.0446	45.2498	69.7121	45.6334	67.0231	32.6872	53.0064	13.6091	26.0895	d4/+
	d4/+	50.9742	81.8573	45.3287	70.2202	46.6235	68.0415	33.7789	54.7441	13.0829	25.3177	d4/+
	d4/+	51.5312	82.7371	47.1773	72.2809	44.9321	67.1639	32.665	53.1	12.905	25.4581	d4/+
	d4/+	53.8269	85.4316	46.9446	72.9682	47.4676	68.6465	33.191	53.4891	12.3974	24.1813	d4/+
	d8/-	67.0763	101.326	53.9065	79.0115	50.7188	72.6183	35.5354	56.6331	14.5146	27.938	d8/-
	d8/-	65.0014	98.4261	54.1116	80.637	39.4245	63.4064	35.9236	57.3759	16.3214	29.1826	d8/-
	d8/-	61.5438	94.546	58.4135	84.6732	52.4075	75.3779	38.071	59.1219	13.6975	27.3184	d8/-
	d8/-	67.9396	101.733	56.2014	82.0368	51.442	74.1728	36.5261	57.6519	17.1835	29.5046	d8/-
	d8/+	74.3496	103.204	69.1697	90.266	65.2714	84.7109	40.4385	58.4455	22.5134	29.5546	d8/+
	d8/+	73.5436	102.752	70.7668	92.6174	68.0846	87.2625	38.2086	54.5945	21.4841	29.5476	d8/+
	d8/+	74.4975	102.873	68.7642	90.9163	62.8987	82.6319	39.0054	56.6313	21.9014	28.9944	d8/+
	d8/+	72.3707	101.493	68.2388	90.5523	61.7954	81.005	39.5959	57.184	21.4575	29.6771	d8/+
	d12/-	73.1375	108.159	60.7194	89.5159	57.4639	83.9024	41.3794	64.2301	19.4066	34.8511	d12/-
	d12/-	70.9455	107.54	62.7764	91.816	58.4562	84.9305	40.1259	62.9055	19.3745	34.6615	d12/-
	d12/-	71.611	106.893	62.4546	92.0243	59.4043	86.3596	39.5099	63.0201	17.4046	33.5591	d12/-
	d12/-	68.8635	104.224	62.9471	92.6231	59.9261	86.842	38.2394	63.2486	17.3061	34.2939	d12/-
	d12/+	77.1386	104.491	78.2346	98.4649	74.249	91.775	45.2175	60.5928	25.8902	29.4659	d12/+
	d12/+	75.2812	102.608	78.1859	98.3009	74.9223	93.1924	44.4931	59.4802	26.4974	29.6349	d12/+
	d12/+	74.7998	102.309	77.9209	98.2308	74.0096	92.4769	43.5779	58.5935	25.6709	29.2665	d12/+
	d12/+	73.7841	101.391	74.0069	94.4307	73.9726	92.1549	43.4236	59.5765	24.8975	28.84	d12/+

## Sheet: Dataset S5
	Dataset S5. Data set matrix of the differences in fluorescence intensity before and after the addition of serum-supplemented spent media used to culture mixtures of stem cells and cancer cells (I–I0) generated from the chemical tongue. The jackknife test afforded 97% accuracy. The rightmost column indicates whether the data in the corresponding row was used as training data (denoted by “–”) or te…
		P1		P2		P3		P4		P5		Verification by Holdout test
		Ch1	Ch2	Ch1	Ch2	Ch1	Ch2	Ch1	Ch2	Ch1	Ch2
	Blank	43.5864	82.9234	51.7897	85.0767	40.3326	67.0084	30.4492	48.9551	13.6509	25.208	-
	Blank	45.352	84.5276	53.0644	79.4518	40.2095	65.2301	31.4862	48.6243	13.2359	23.4445	-
	Blank	43.3759	84.6709	50.4646	80.1916	42.8045	70.7015	30.2131	49.2643	13.7048	24.6818	-
	Blank	44.7606	84.5005	52.2116	81.3779	38.9969	63.3886	30.6003	48.0049	13.6354	22.8606	-
	Blank	44.771	84.877	55.5941	87.3067	41.1415	64.8839	30.929	50.0511	15.284	24.6214	-
	Blank	43.1124	83.9009	50.0796	77.6094	37.2394	61.6508	29.5141	49.1386	14.4036	23.6464	-
	0/6	50.5501	91.0677	57.6037	90.1546	45.4574	73.7152	34.675	57.6528	17.3884	28.0251	-
	0/6	54.473	99.3897	63.9731	100.717	51.6418	84.1911	36.7387	63.0769	18.0285	37.981	-
	0/6	52.7349	96.035	59.7224	93.559	47.7282	80.1635	35.5539	60.1199	19.1507	30.3276	-
	0/6	54.623	97.2574	58.5749	90.9933	46.3701	78.4936	34.2974	58.197	18.3734	30.7499	-
	0/6	53.9759	98.0466	63.5704	100.949	51.2309	85.661	36.7415	62.1859	18.3272	29.8936	-
	0/6	50.7037	94.2405	51.9719	84.4815	47.9638	80.9332	35.5289	60.7979	18.3571	31.2756	-
	2/4	47.8911	89.115	51.1911	85.1158	40.7124	71.3246	30.7547	56.3659	17.079	29.0671	-
	2/4	48.7849	94.7558	58.3879	98.1886	47.5488	82.656	31.7931	55.4292	16.2234	28.7715	-
	2/4	45.9121	87.6899	47.0616	77.4578	41.1825	74.3727	31.7249	57.0371	17.5964	25.7215	-
	2/4	49.9081	95.9124	61.7649	103.882	47.9947	81.7329	31.6079	58.3671	16.8682	30.9739	-
	2/4	47.6364	91.0102	51.2791	85.5506	39.4162	72.5174	31.2606	58.2346	16.9623	31.3036	-
	2/4	49.0965	95.729	56.9524	97.2251	47.0821	82.5749	30.0038	59.869	16.9004	27.6445	-
	4/2	42.8295	82.9029	46.5035	81.2144	32.9481	66.4466	29.1848	54.7204	16.6895	30.7038	-
	4/2	46.1096	89.5025	51.2809	91.3919	39.8308	74.6971	28.8278	56.9952	15.5179	31.4797	-
	4/2	42.0093	82.9418	39.7734	71.2956	36.1436	68.4204	29.7709	55.9349	14.9312	28.7899	-
	4/2	45.1496	89.6501	56.3699	97.4446	42.137	75.528	30.4726	57.1305	15.2821	30.4564	-
	4/2	43.8533	83.1309	46.5152	80.1134	33.7553	63.1005	29.137	53.5014	15.0587	26.6398	-
	4/2	45.0883	86.7246	52.5704	89.7155	37.4266	71.0288	28.5766	54.8982	15.3323	28.6531	-
	6/0	37.2044	78.7522	44.1795	74.764	30.8392	62.2172	28.1601	52.8586	13.6694	27.099	-
	6/0	42.918	87.3431	50.3174	87.3936	37.9078	68.8845	29.9502	54.3209	14.3245	27.1187	-
	6/0	38.2306	79.4787	42.2376	76.0136	32.5635	65.6829	27.7661	53.1685	13.076	26.9089	-
	6/0	40.1953	80.2692	48.0801	84.5695	40.0218	72.5174	28.8594	55.3759	13.2721	28.228	-
	6/0	39.6751	80.7885	43.8106	77.6181	34.2967	65.7837	28.7486	54.2219	14.5689	28.2801	-
	6/0	41.6991	84.311	53.657	92.3839	39.3959	73.3188	29.7886	57.854	14.2809	27.9911	-
	Blank	45.1615	85.3754	56.4097	86.5555	46.7174	72.5287	35.2595	55.212	13.4	22.1089	Blank
	Blank	43.2716	82.267	57.117	88.8245	45.5896	71.9324	32.5305	54.4582	13.4939	25.6695	Blank
	Blank	43.7184	82.5531	57.4039	87.3531	43.1966	69.6425	32.6714	55.1863	13.3246	23.3597	Blank
	Blank	44.2506	83.4278	56.7445	87.856	45.013	72.2099	33.2507	55.8715	15.0516	25.1703	Blank
	0/6	53.7787	98.995	71.431	114.3	52.6404	87.2356	37.5063	64.3461	18.7089	33.0699	0/6
	0/6	53.5095	97.5124	58.6651	93.3086	48.1434	78.3208	37.4661	60.3646	18.1424	28.4416	0/6
	0/6	54.3166	100.382	65.1165	103.221	53.9672	88.4567	38.6055	65.2715	18.6489	31.0584	0/6
	0/6	49.5192	94.3662	57.402	93.2549	47.3582	81.2916	34.422	60.2491	18.3472	32.5366	0/6
	2/4	47.4875	88.1369	53.2995	85.5915	39.9543	70.3166	33.0185	58.626	18.1735	29.3881	2/4
	2/4	51.0233	99.1999	58.0989	99.3956	46.4776	80.098	33.1196	60.1464	18.6754	31.6668	2/4
	2/4	48.4931	88.6719	51.4426	84.7351	41.2714	71.4811	33.7236	57.9182	18.033	29.0009	0/6
	2/4	51.6	95.3396	58.1888	95.2409	46.3068	78.8805	33.5155	57.496	16.9061	28.8801	2/4
	4/2	41.8097	80.8615	47.4857	77.8235	34.9808	62.593	29.873	53.0267	16.1712	27.9329	4/2
	4/2	46.8794	89.9146	51.8135	90.6731	40.6416	70.5883	29.9571	54.0779	15.2826	26.8829	4/2
	4/2	43.898	84.1605	44.9494	77.2177	34.9022	66.5055	31.0712	57.3114	16.5826	29.2122	4/2
	4/2	46.3671	89.3776	52.6812	90.7349	41.1121	72.2279	31.456	58.4562	16.6065	28.5924	4/2
	6/0	38.414	79.5457	44.0995	77.6406	33.109	66.8835	26.6525	52.8463	13.5143	28.9152	6/0
	6/0	40.1405	81.4736	48.6935	87.7941	39.1184	72.0369	28.0338	55.8373	14.958	31.0559	6/0
	6/0	39.1125	80.1431	45.0379	76.9952	34.3004	65.8417	29.7742	55.4723	15.6064	28.7735	6/0
	6/0	42.4733	84.5116	49.6964	86.0957	38.5779	70.7093	30.3878	57.457	15.4456	27.4604	4/2
